# Supplementary material for: Observations of traveling ionospheric disturbances driven by gravity waves from sources in the upper and lower atmosphere
Source: Copernicus journal article supplement (doi:10.5194/angeo-43-511-2025), 2025-09-16
Supplement: Supplementary file 1 [file Supplementary_Material_Anngeo-v6.pdf › Supplementary_Material_Anngeo-v6/Supplementary_Material_Anngeo-v6.pdf]

*Supplement of*

## **Observations of traveling ionospheric disturbances driven by gravity waves from sources in the upper and lower atmosphere**

**Paul Prikryl et al.**

Correspondence to: Paul Prikryl (paul.prikryl@unb.ca)

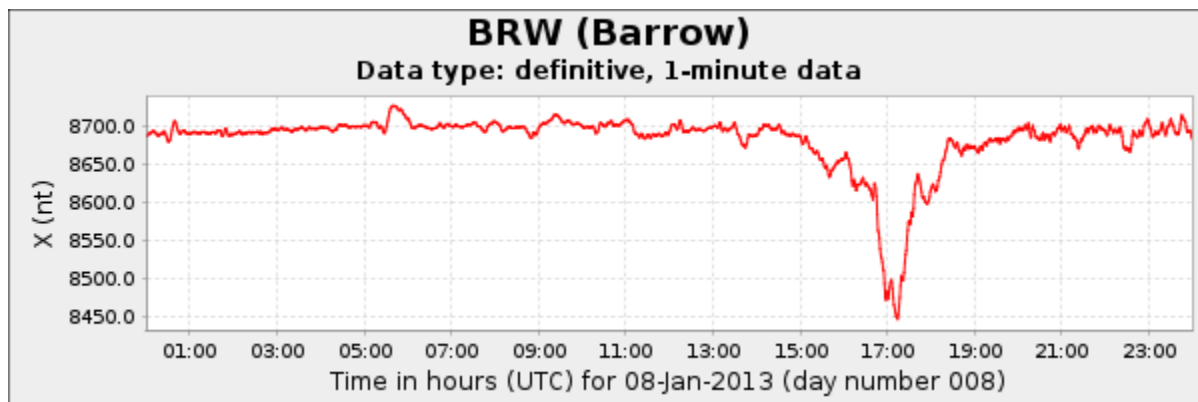

**Figure S1.** The north-south  $X$ -component observed by the magnetometer in Barrow (<https://img-data.bgs.ac.uk/GIN/>) indicating westward electrojet.

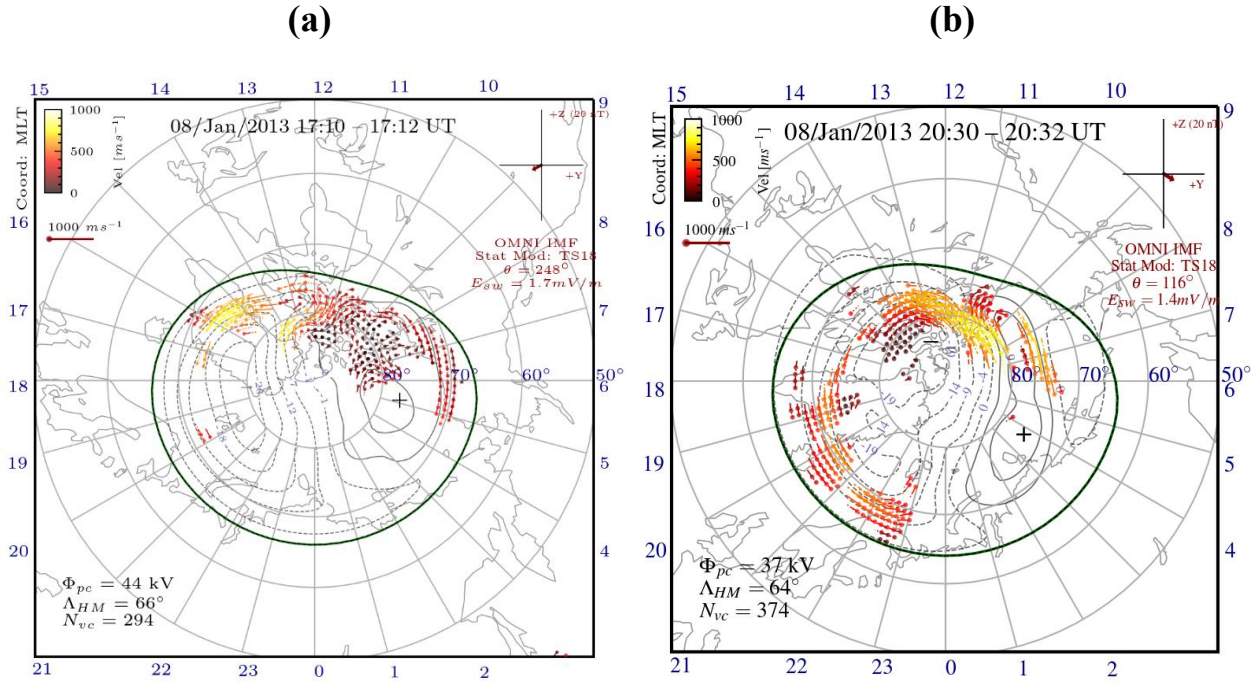

**Figure S2.** The SuperDARN ionospheric convection maps for the IMF pointing (a) downward ( $B_y < 0$ ) and (b) duskward ( $B_y > 0$ ).

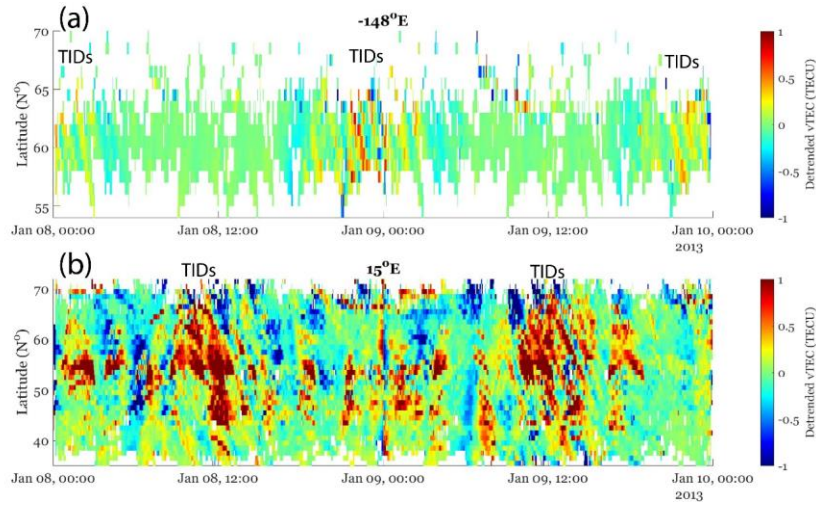

**Figure S3.** The detrended GNSS vTEC mapped at latitude bins along the longitudes (a)  $-148^\circ$  and (b)  $15^\circ$ .

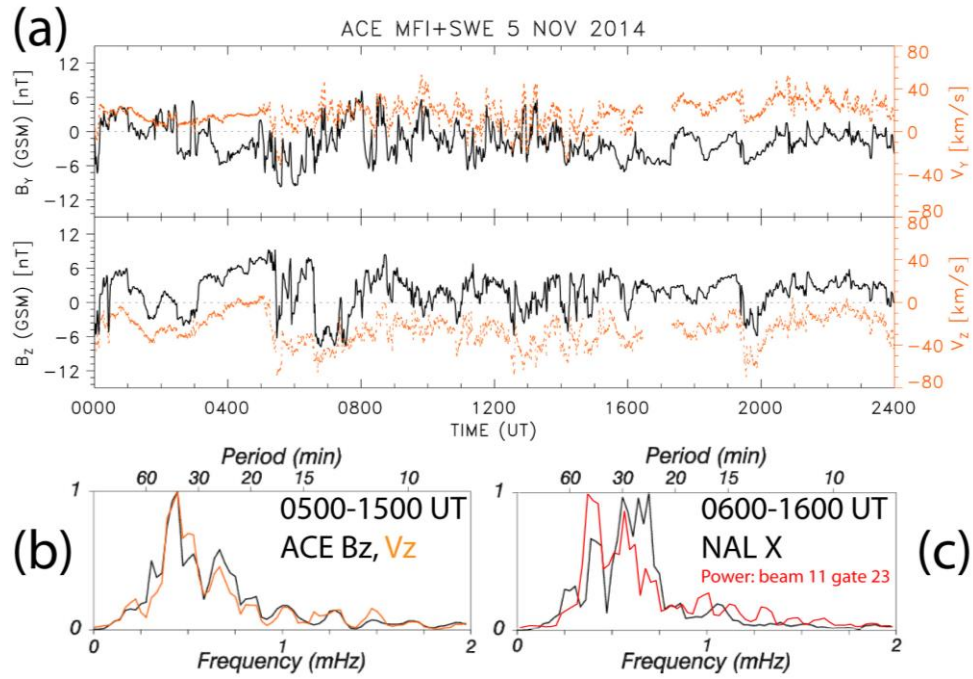

**Figure S4:** (a) The components of the magnetic field and solar wind velocity observed by ACE, (b) the FFT spectrum of the detrended time series of IMF  $B_z$  and solar velocity  $V_z$ , and (c) the FFT spectrum of the time series of the X-component of ground magnetic field perturbations in Ny Ålesund (NAL) and the Hankasalmi radar ground scatter power (beam 11, gate 23, slant range 1215 km; 06:50-16:50 UT).

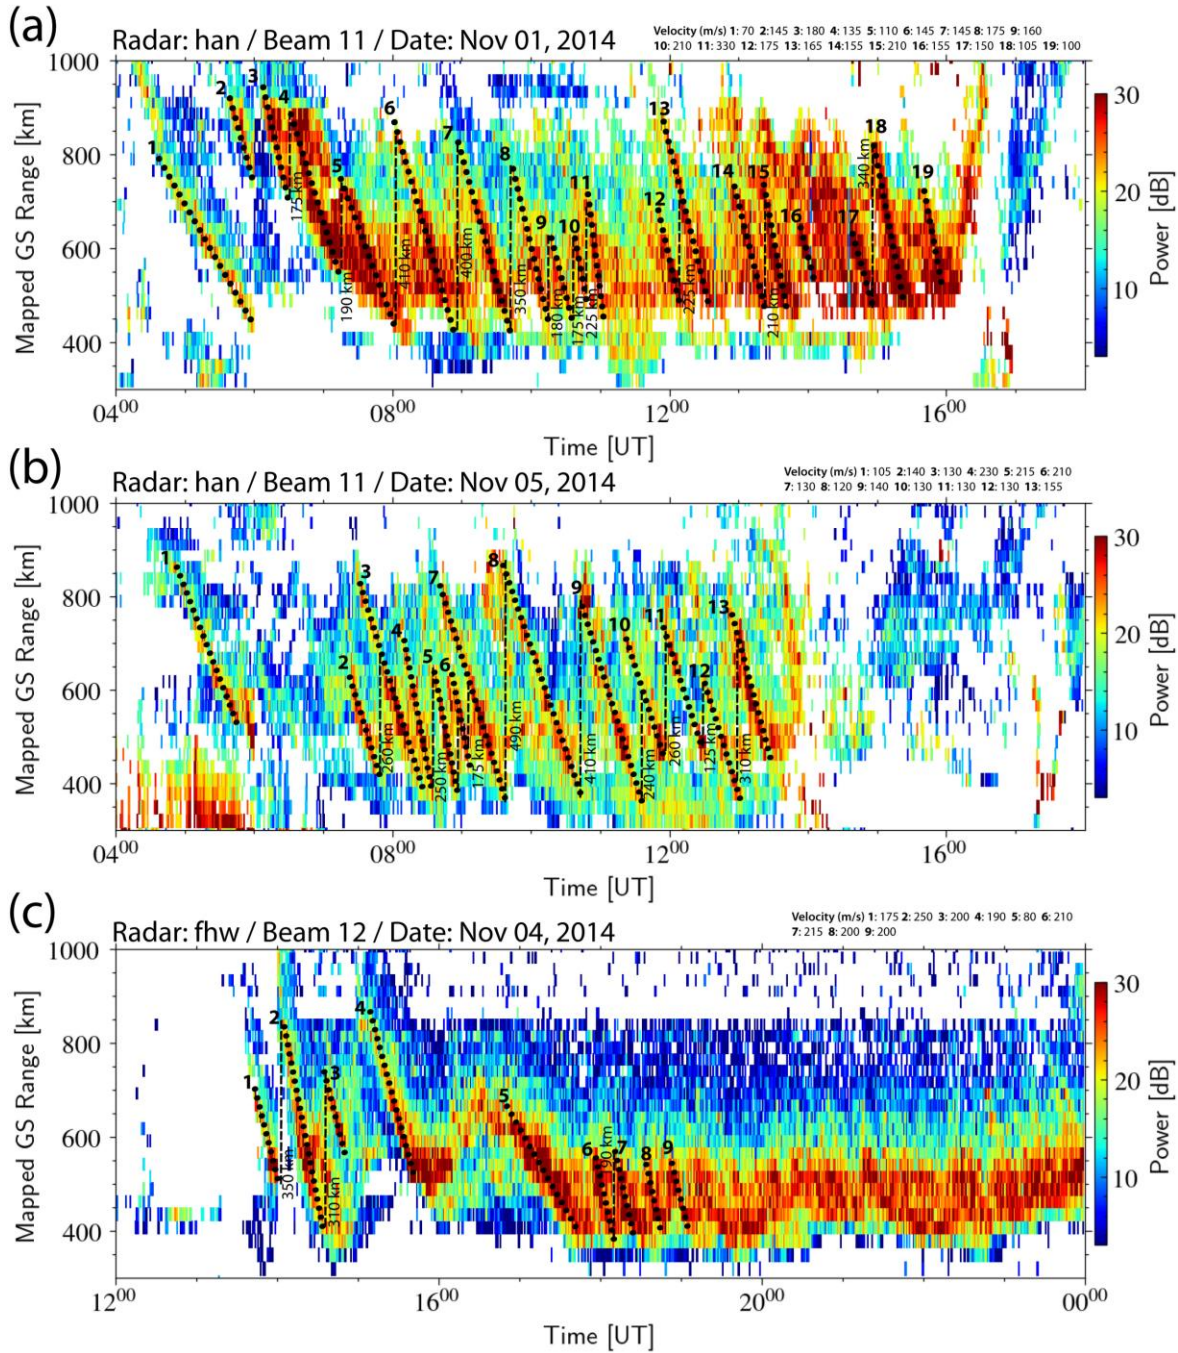

**Figure S5:** The mapped ground scatter power for the Hankasalmi radar on **(a)** November 1, **(b)** November 5, and for the Fort Hays West radar on **(c)** November 4, 2014, with estimates of TIDs wavelengths and phase velocities to support Figs 5, 6 and 8.



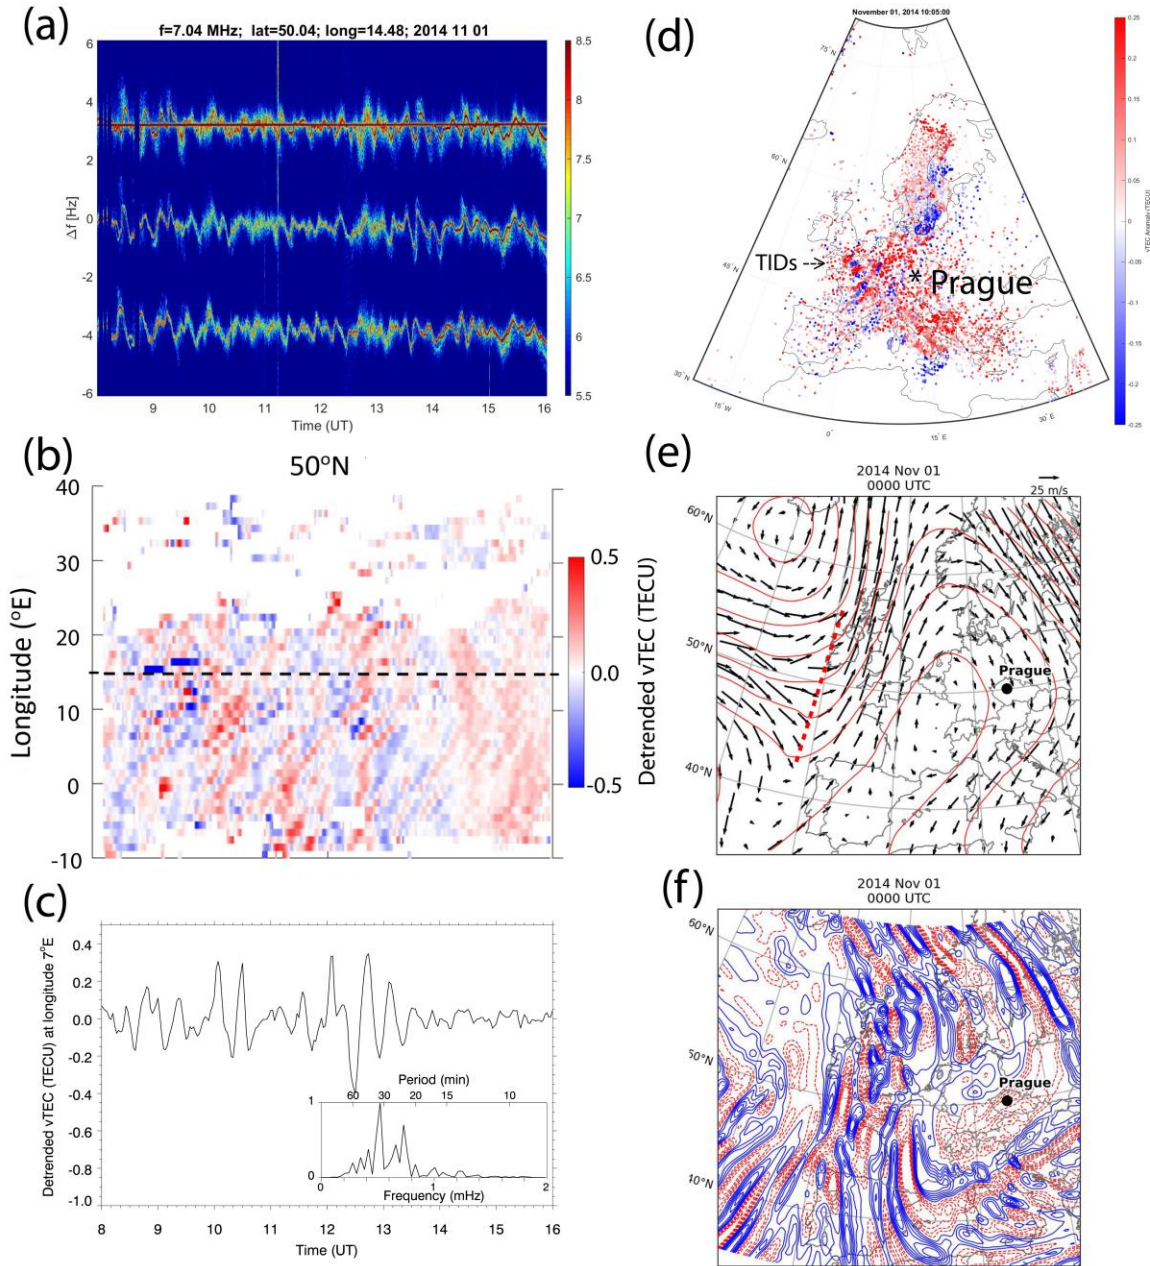

**Figure S6.** (a) The Doppler shift spectrogram recorded at frequency 7.04 MHz, (b) the detrended vTEC mapped along latitude of  $50^\circ\text{N}$ , (c) a time series of detrended vTEC at longitude of  $7^\circ\text{E}$  along with a normalized FFT spectrum, (d) a detrended vTEC map, and (e) the ERA5 300-hPa geopotential height (red contours at intervals of 100 m), approximate axis of inflection (red dashed line), and wind vectors (m/s) at 300-hPa level, and (f) the ERA5 divergence (positive in solid blue line) of the horizontal wind at 150-hPa level, on November 1, 2014.

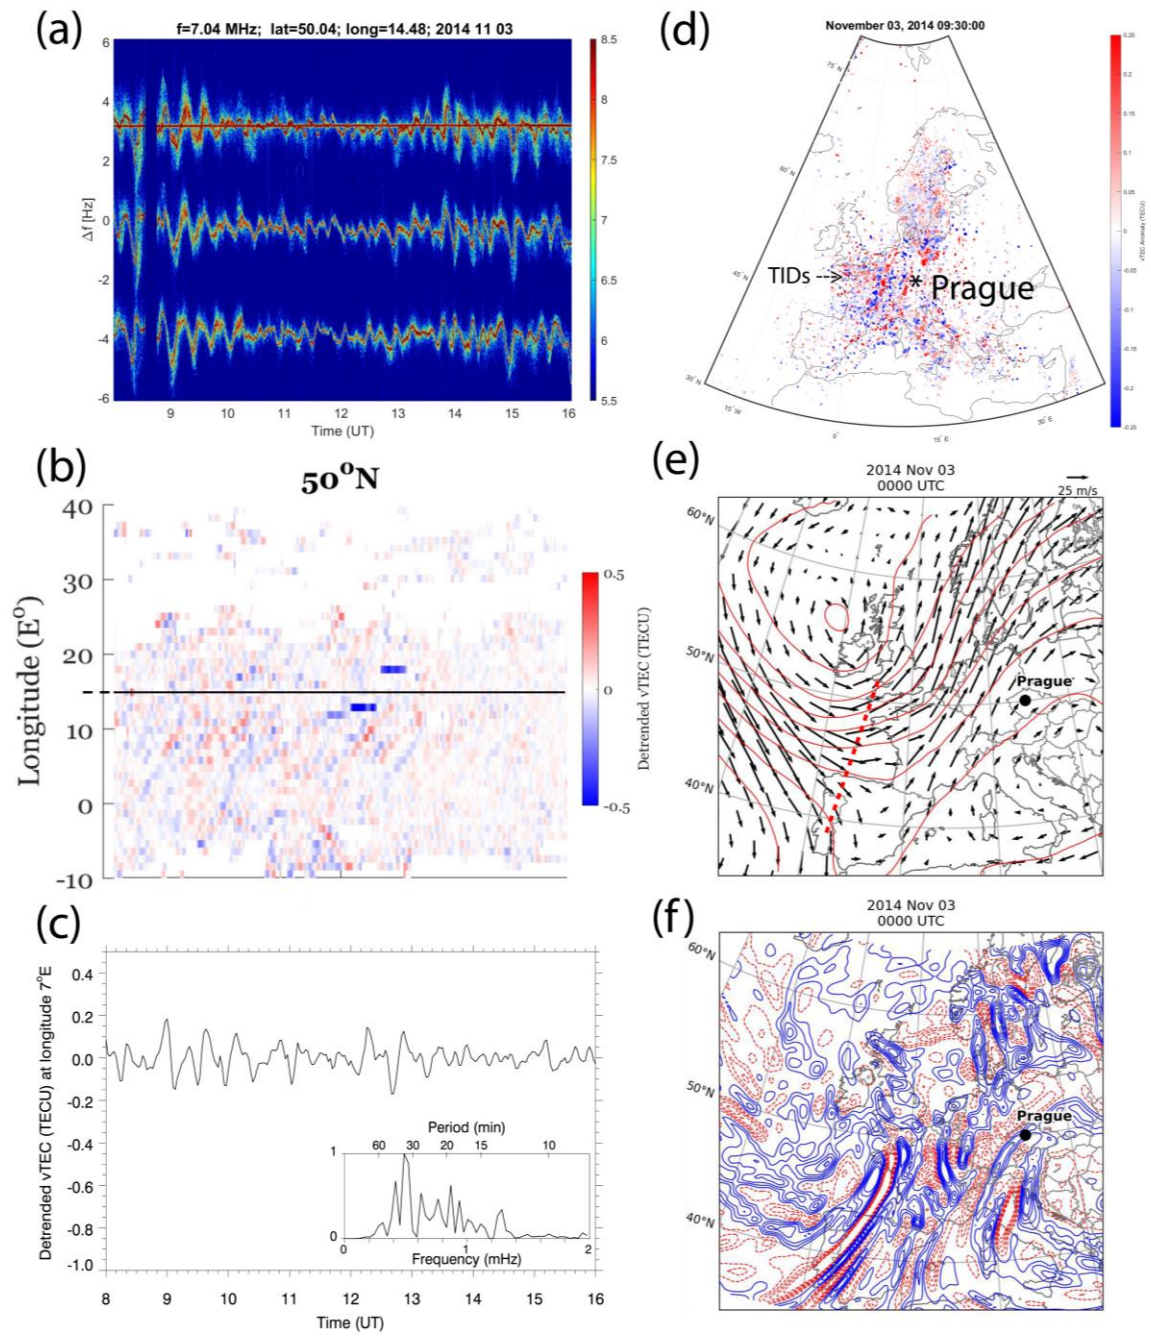

**Figure S7.** The same as Figure SF7, but for November 3, 2014.



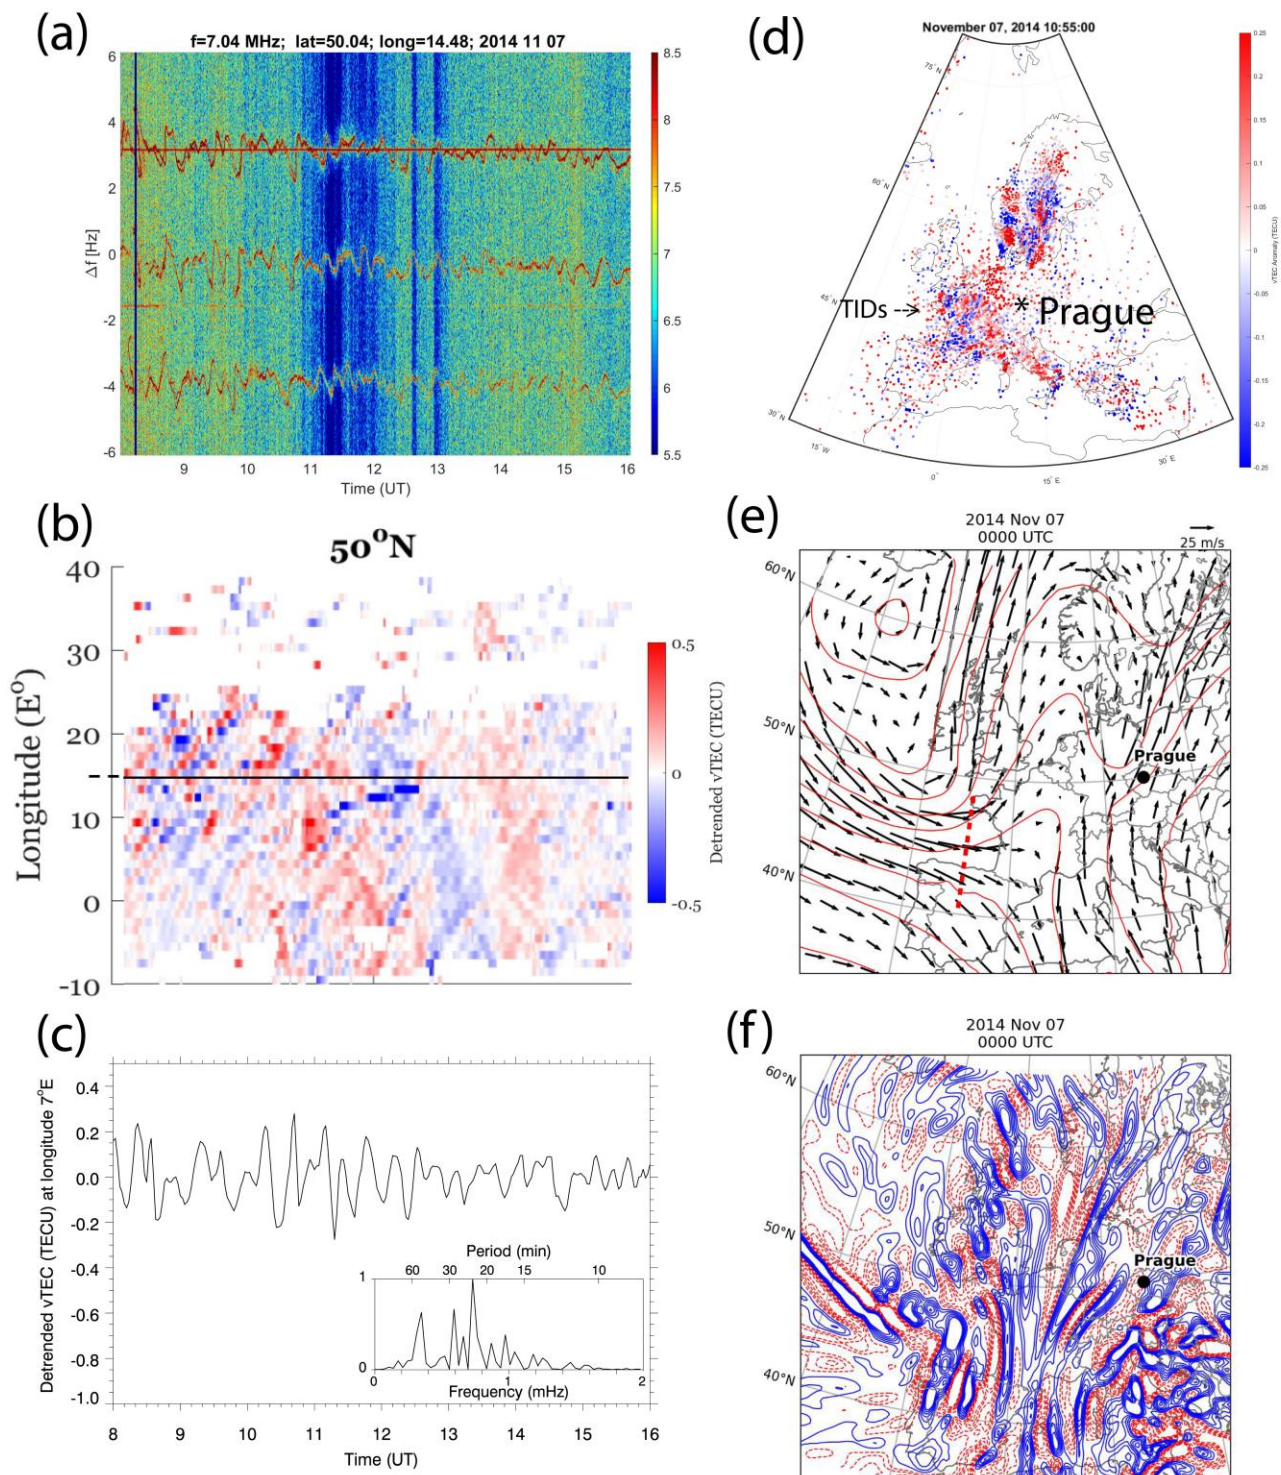

**Figure S8.** The same as Figure SF7, but for November 7, 2014.

**Table S1.** The 2-D and 3-D propagation analysis of the HF Doppler sounders data

| Date and time             | $v_{\text{ha}}$ (m/s) | Azimuth ( $^{\circ}$ ) | $f_o$ (MHz) |
|---------------------------|-----------------------|------------------------|-------------|
| 2014/11/01 09:00-10:15 UT | $156 \pm 21$          | $89 \pm 6$             | 4.65        |
| 2014/11/01 09:00-10:15 UT | $142 \pm 8$           | $103 \pm 7$            | 7.04        |
| 2014/11/03 08:30-09:30 UT | $175 \pm 6$           | $118 \pm 10$           | 7.04        |
| 2014/11/05 10:00-11:15 UT | $160 \pm 15$          | $105 \pm 10$           | 3D analysis |
| 2014/11/07 08:00-10:00 UT | $140 \pm 10$          | $105 \pm 10$           | 7.04        |
| 2014/11/08 10:00-11:00 UT | $122 \pm 5$           | $144 \pm 2$            | 4.65        |
| 2014/11/08 10:00-11:00 UT | $110 \pm 15$          | $106 \pm 3$            | 7.04        |
| 2014/11/08 14:00-15:30 UT | $190 \pm 10$          | $135 \pm 5$            | 3D analysis |



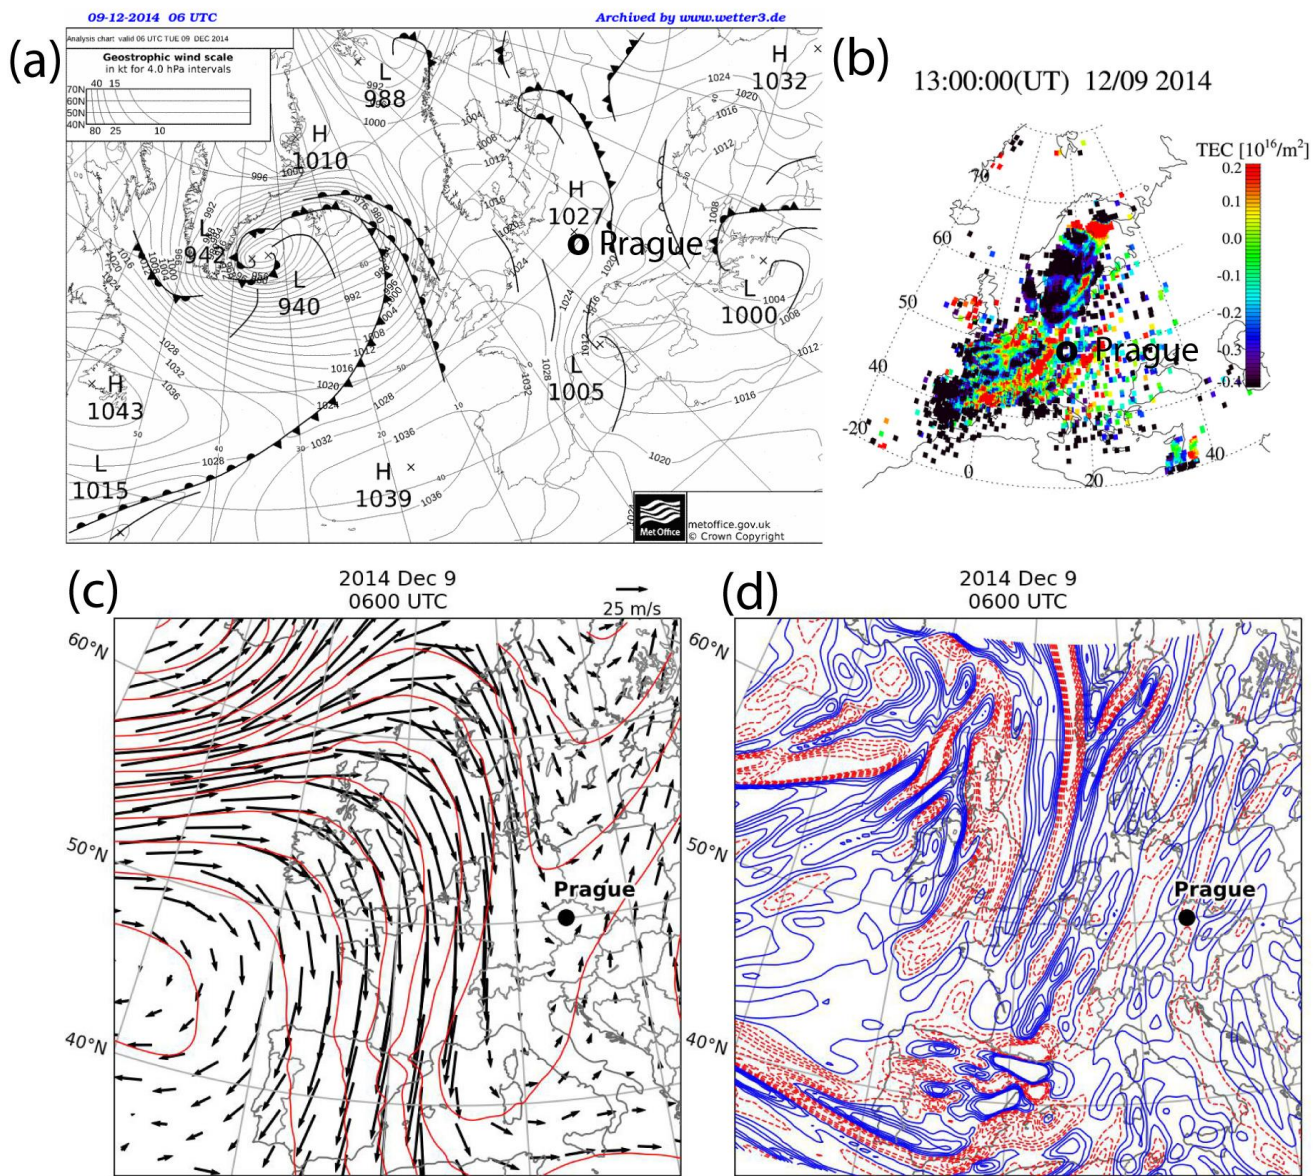

**Figure S9.** (a) Low-pressure system deepening over the North-east Atlantic, shown in the surface pressure analysis charts ([https://www.wetter3.de/archiv\\_ukmet\\_dt.html](https://www.wetter3.de/archiv_ukmet_dt.html)), (b) the detrended TEC map (<https://aer-nc-web.nict.go.jp/GPS/EUROPE/MAP/#2014>) showing southeastward propagating TIDs, (c) the ERA5 300-hPa geopotential height (red contours at intervals of 100 m), approximate axis of inflection (red dashed line), and wind vectors (m/s) at 300-hPa level, and (d) the ERA5 divergence (positive in solid blue line) of the horizontal wind at 150-hPa level, on December 9, 2014.



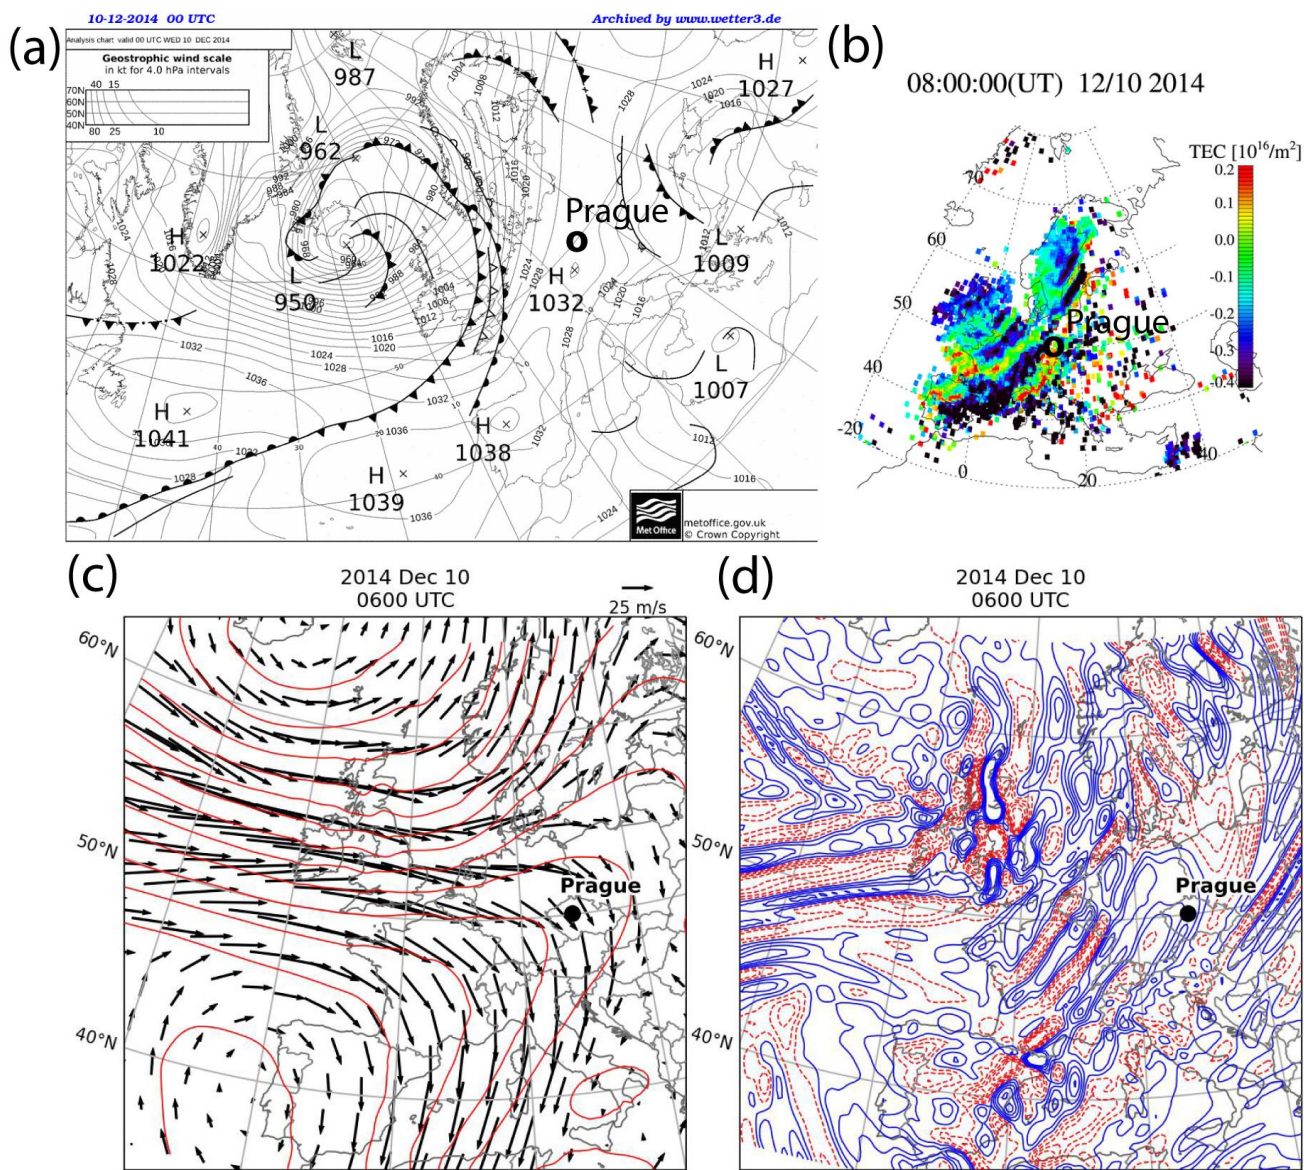



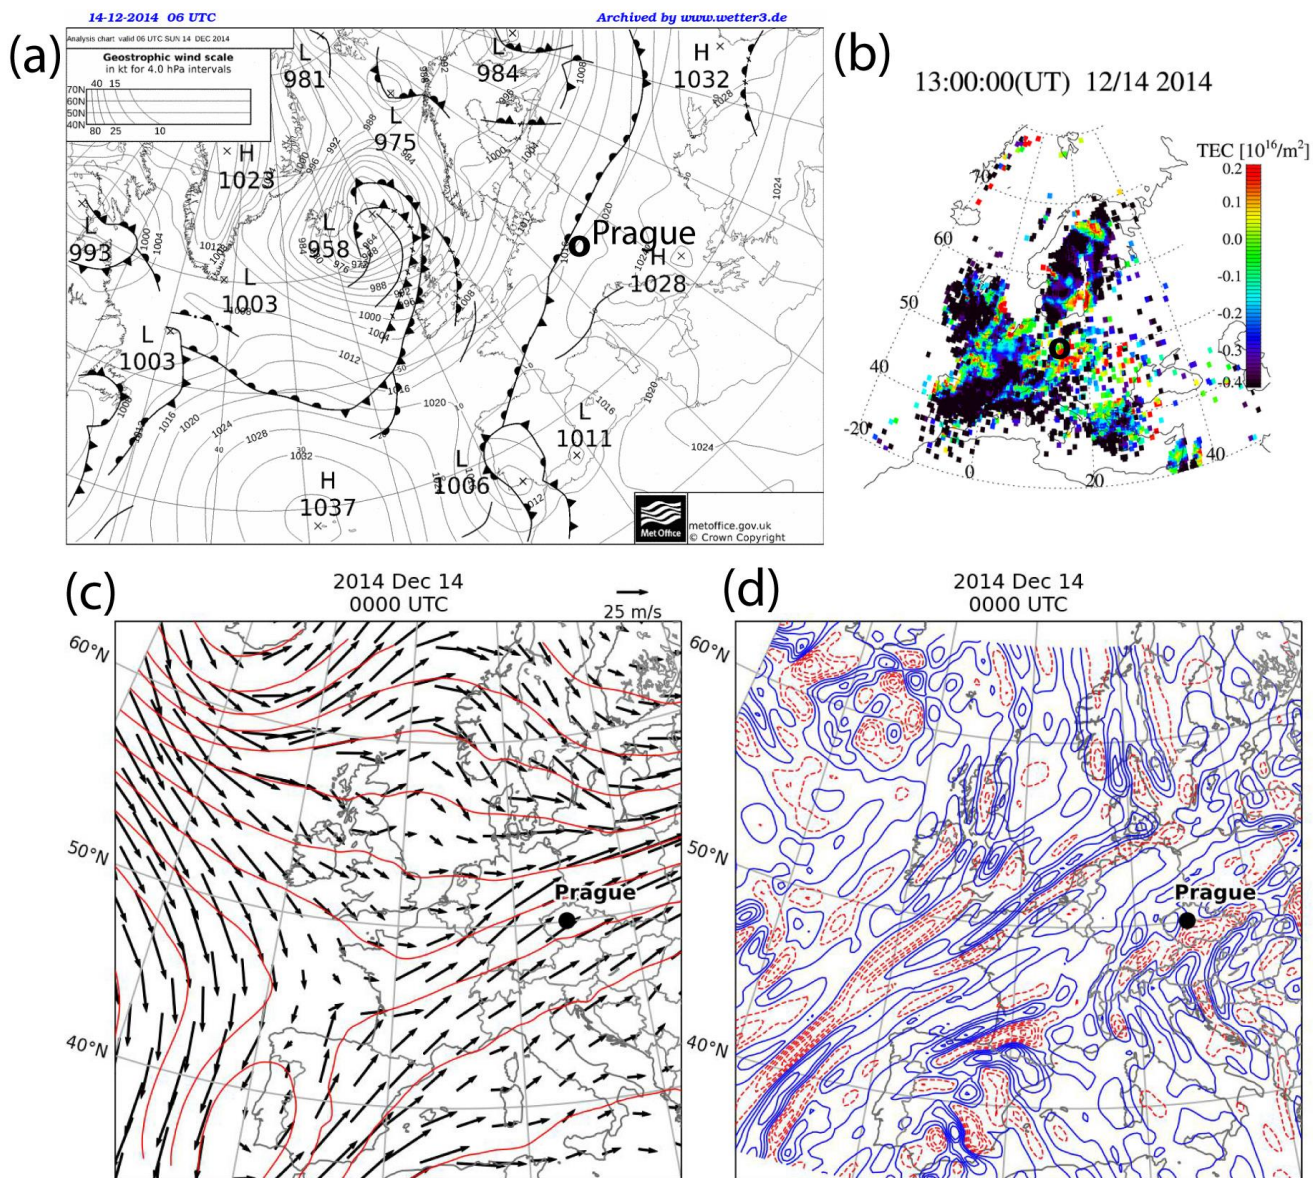

**Figure S11.** The same as Figure SF9, but for December 14, 2014.



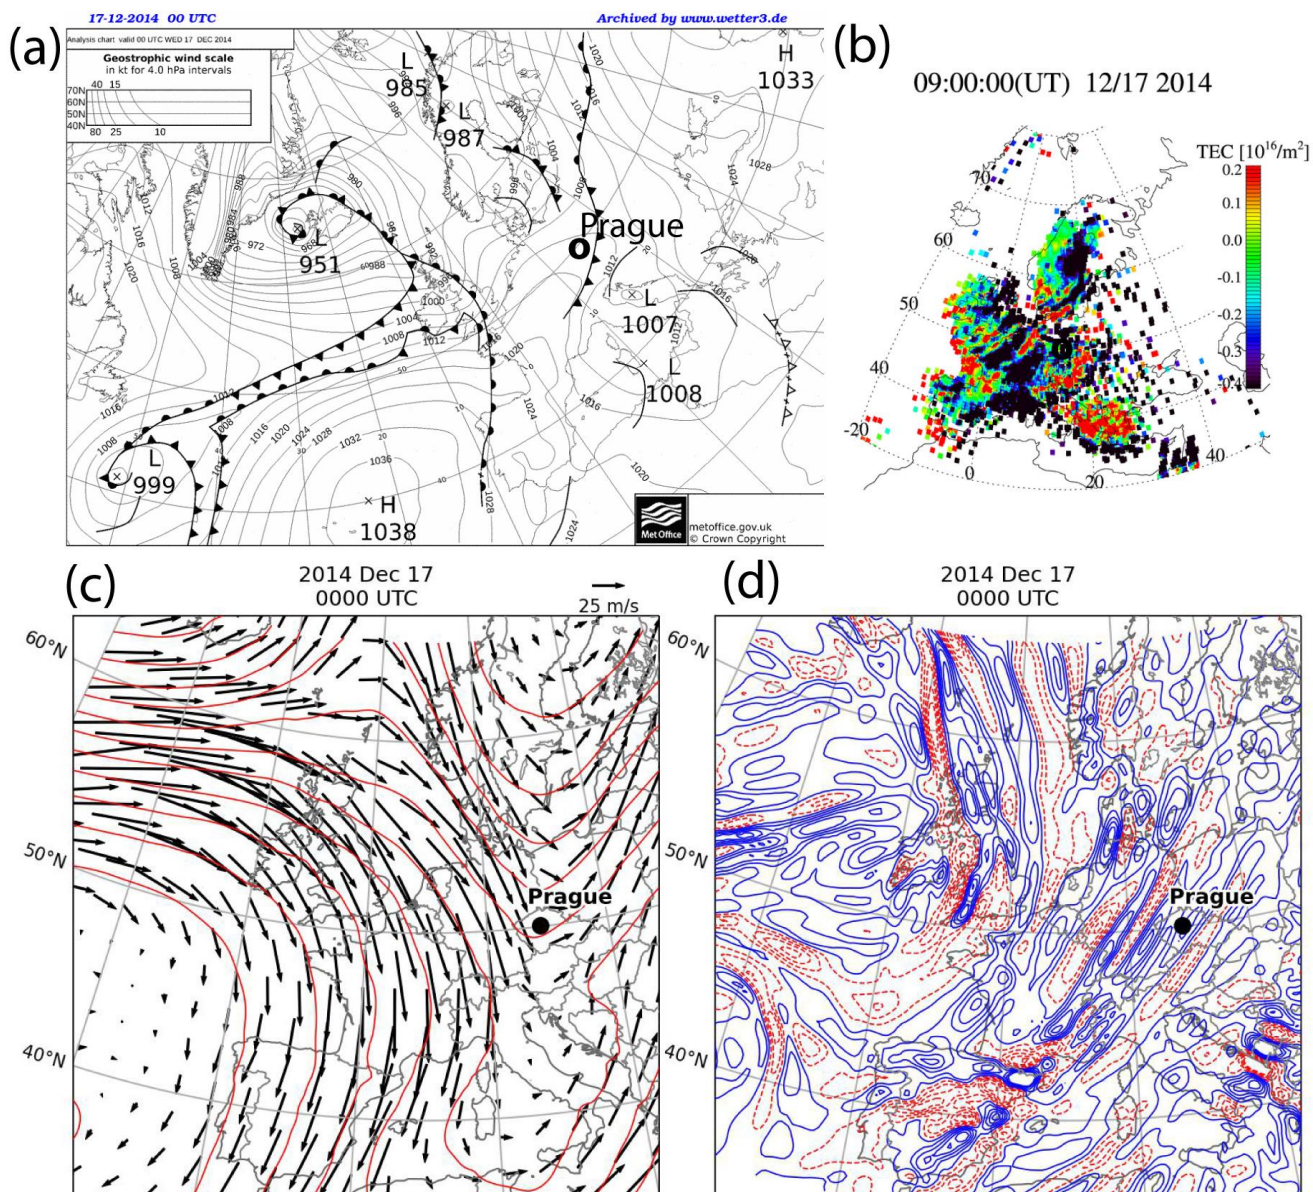

**Figure S12.** The same as Figure SF9, but for December 17, 2014.



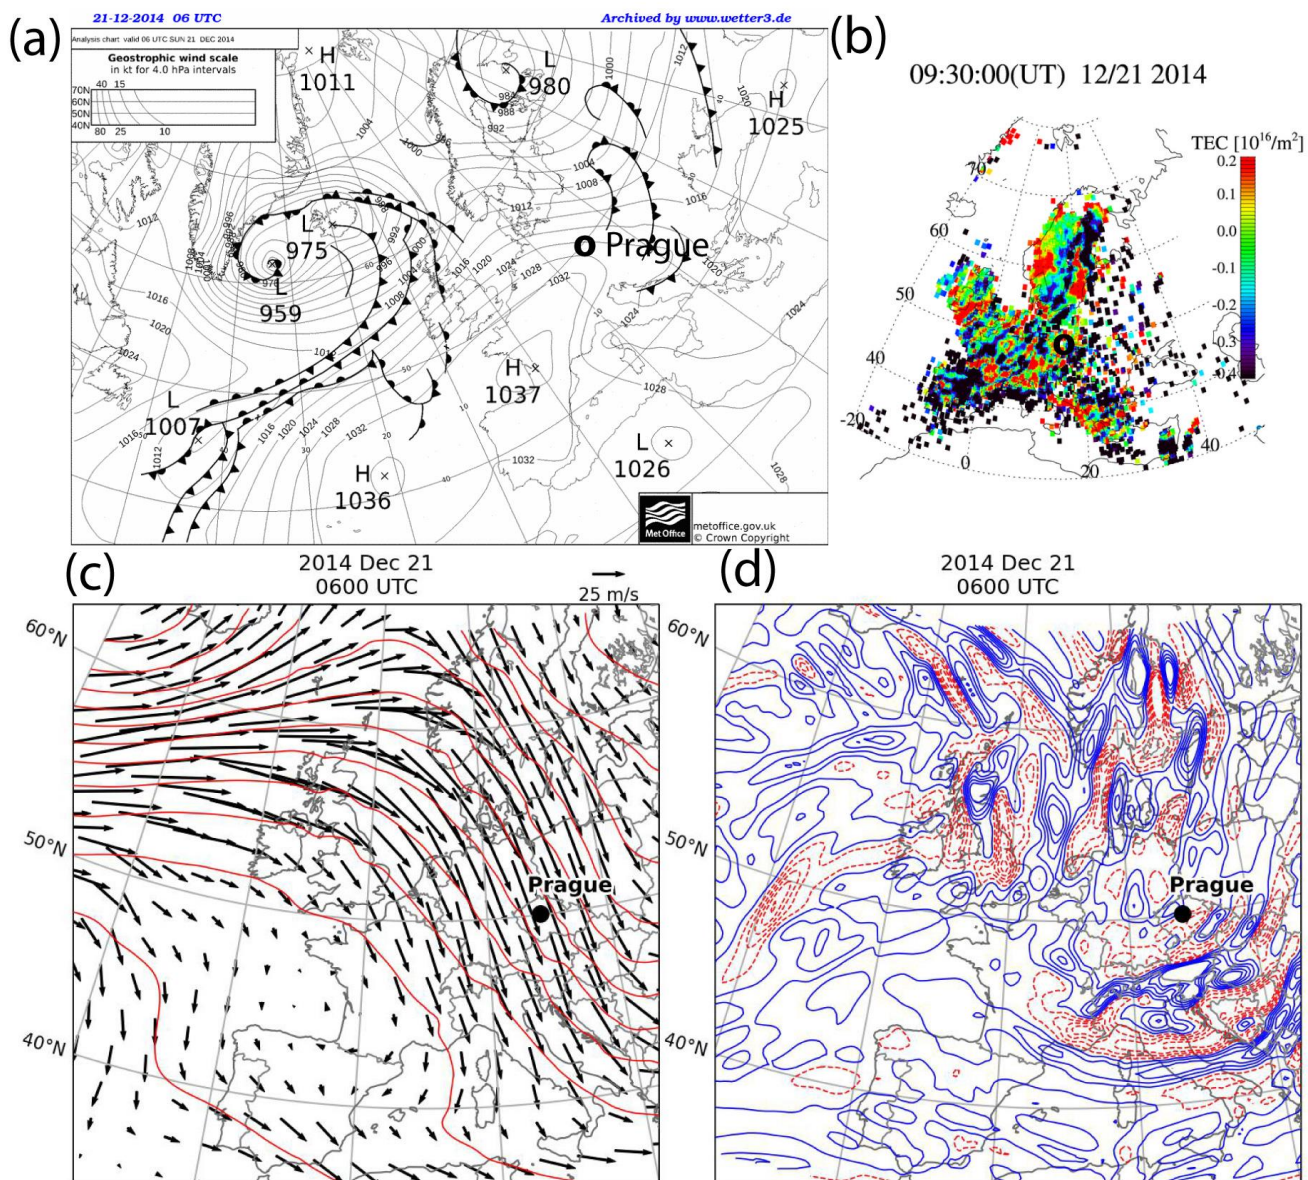

**Figure S13.** The same as Figure SF9, but for December 21, 2014.

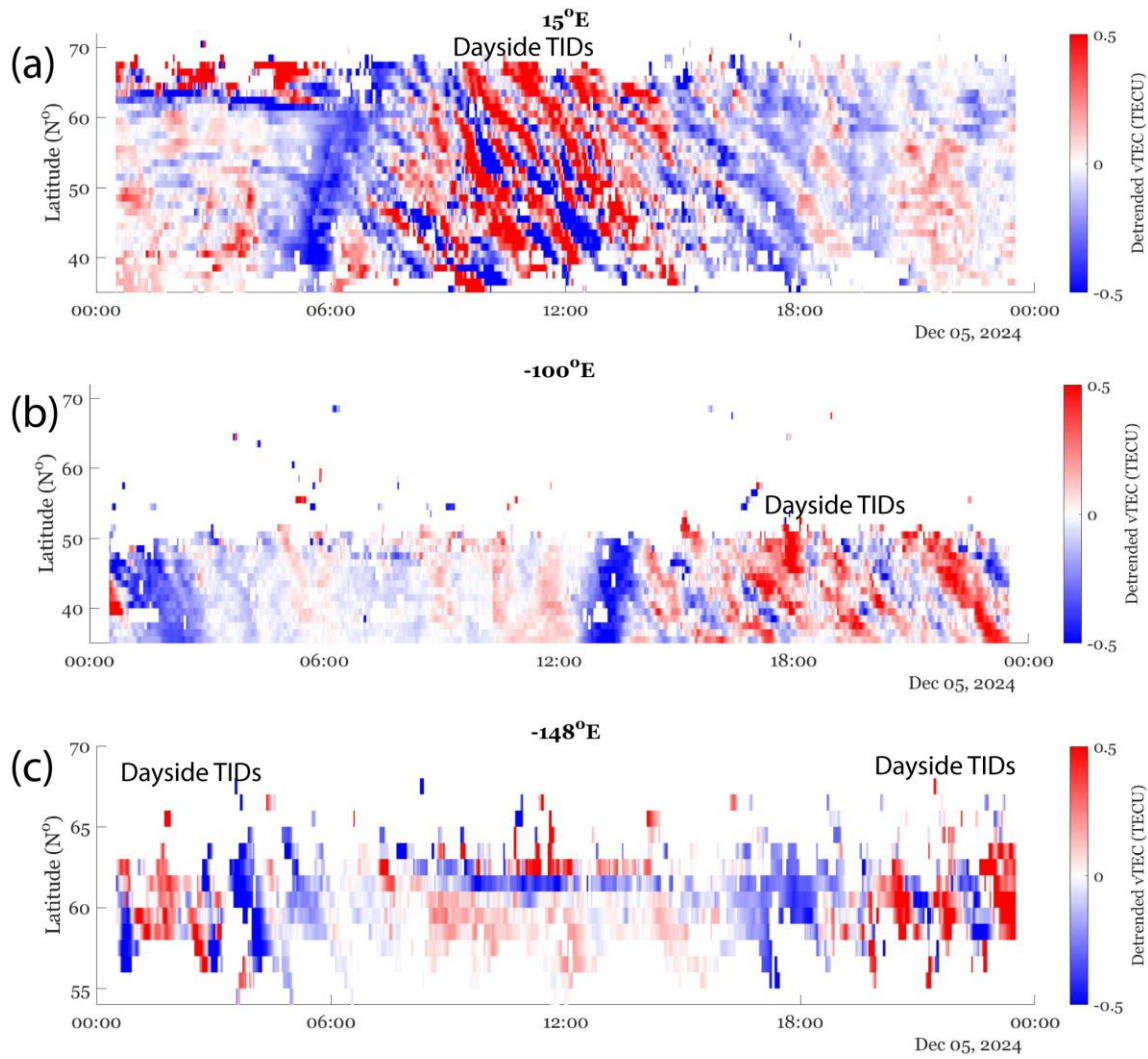

**Figure S14.** The detrended GNSS vTEC mapped at latitude bins along the longitudes (a) 15°E, (b) 100°W and (c) 148°W, on December 5, 2024.
