# Supplementary material for: Observations of traveling ionospheric disturbances driven by gravity waves from sources in the upper and lower atmosphere
Source: Copernicus journal article supplement (doi:10.5194/angeo-43-511-2025), 2025-09-16
Supplement: Supplementary file [file angeo-43-511-2025-supplement-title-page.pdf › angeo-43-511-2025-supplement-title-page.pdf]

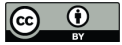

*Supplement of*

**Observations of traveling ionospheric disturbances driven by gravity waves from sources in the upper and lower atmosphere**

**Paul Prikryl et al.**

*Correspondence to:* Paul Prikryl ([paul.prikryl@unb.ca](mailto:paul.prikryl@unb.ca))

- [angeo-43-511-2025-supplement-title-page.pdf](#)
- [Supplementary\\_Material\\_Angeo-v6](#)
  - [20141108\\_0800-1600\\_EU.mpg](#)
  - [Supplementary\\_Material\\_Angeo-v6.pdf](#)

The copyright of individual parts of the supplement might differ from the article licence.
